# Supplementary material
Source: PubMed Central journal article supplement (PMC3758918)
Supplement: NIHMS501115-supplement-Supp_Fig_S1-S4___Table_S1-S4.pdf [file NIHMS501115-supplement-Supp_Fig_S1-S4___Table_S1-S4.pdf]

## Supporting Information

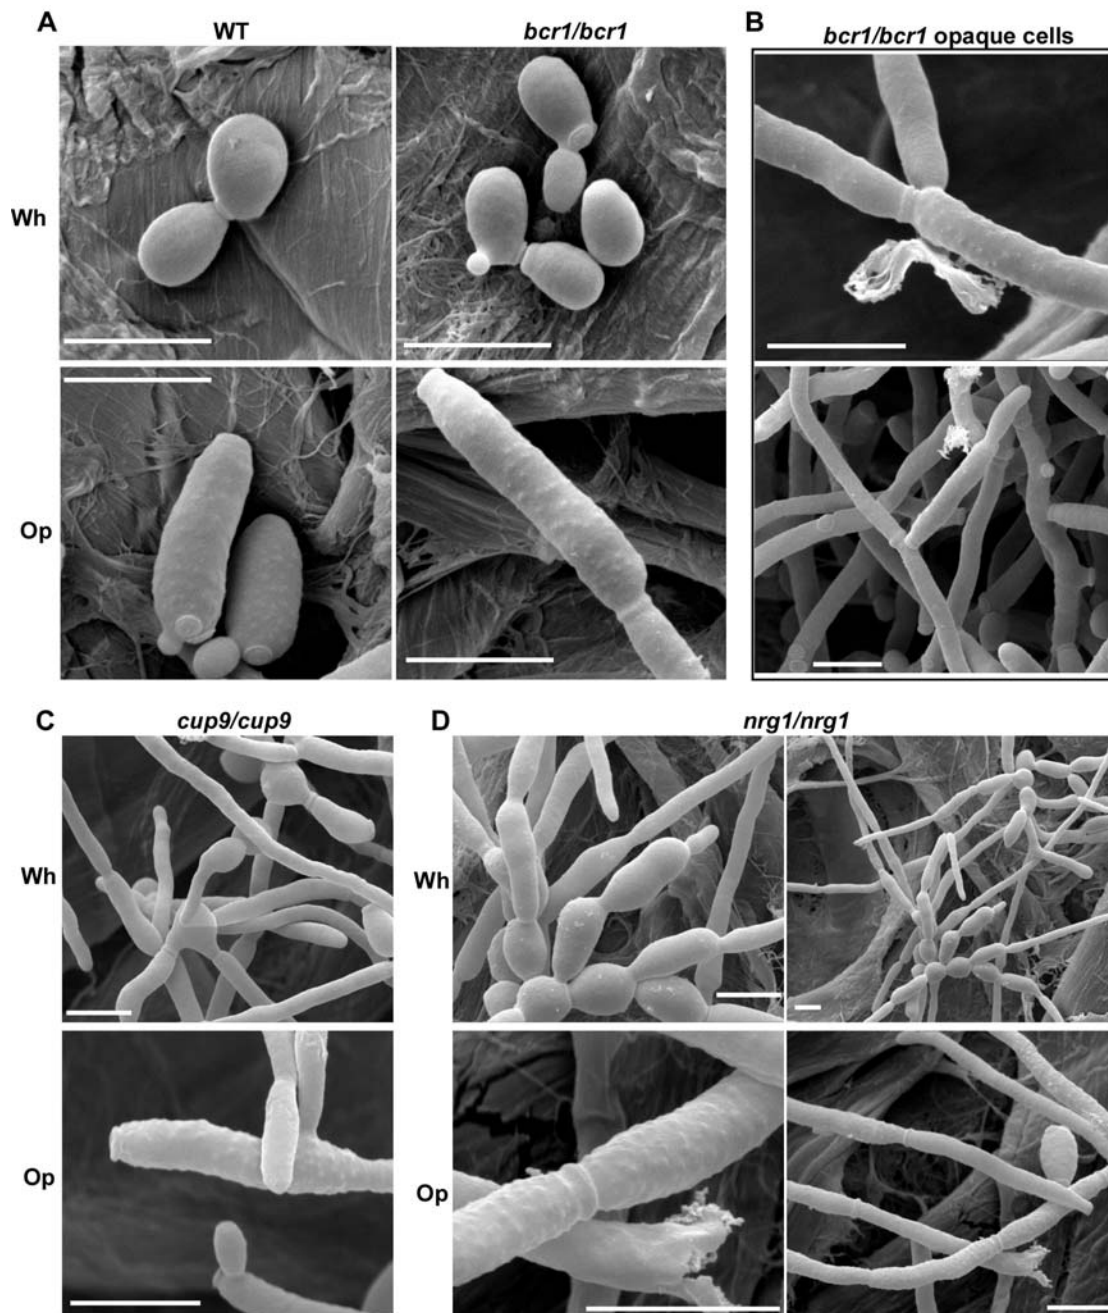

Fig. S1. SEM images of white and opaque cells.

A. Images of white and opaque cells of the WT and *bcr1/bcr1* mutant. B. Two more examples of opaque cells of the *bcr1/bcr1* mutant at different magnifications. C. Images of white and opaque cells of the *cup9/cup9* mutant. D. Images of white and opaque cells of the *nrg1/nrg1* mutant. Scale bar, 5  $\mu\text{m}$ .

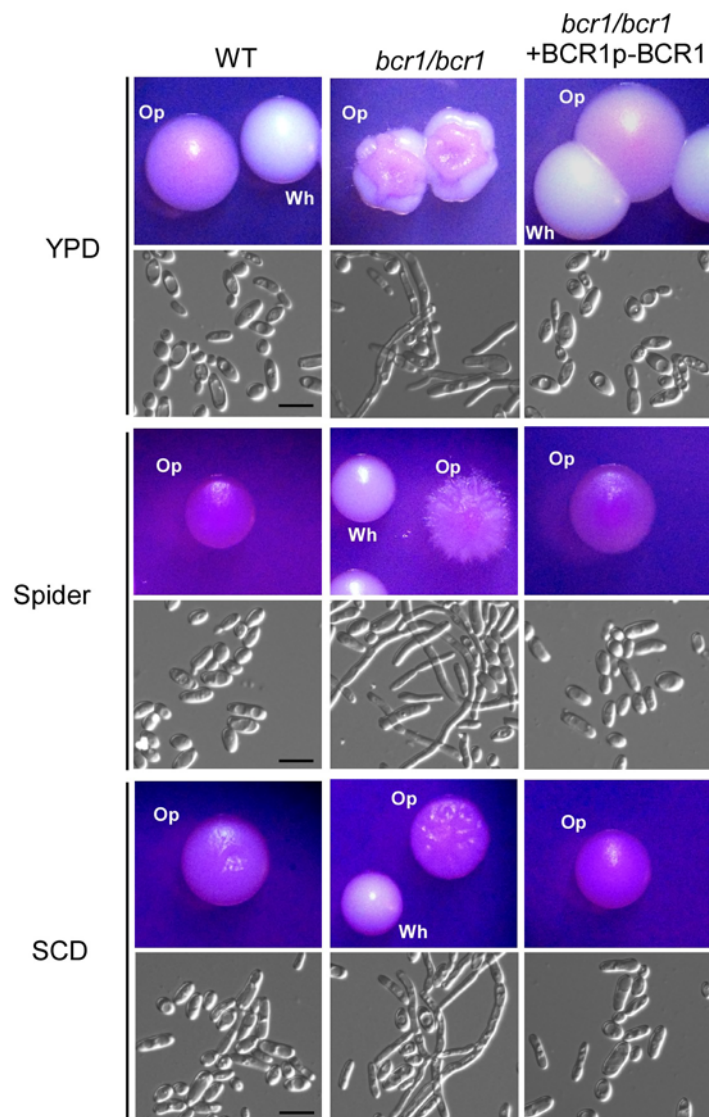

Fig. S2. Opaque cell filamentation of the *bcr1/bcr1* mutant in YPD, Spider and SCD medium.

Cells were plated onto agar plates containing different media as indicated and cultured at 25°C for 5 days. Colony and cellular morphology images of the WT, *bcr1/bcr1* mutant and *bcr1/bcr1*+BCR1p-BCR1 reconstituted strain are shown.

Wh, white colony; op, opaque colony. Scale bar, 10 μm.

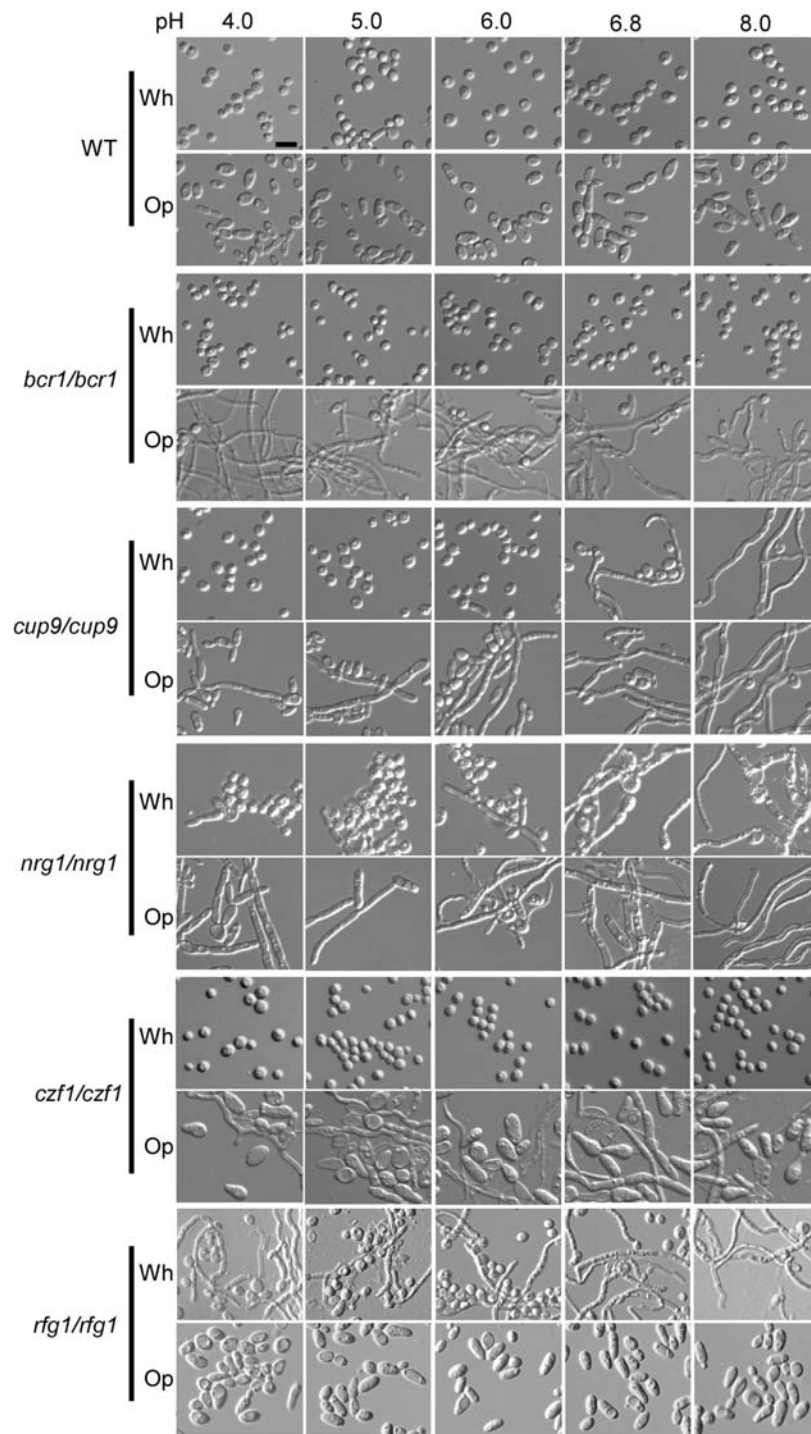

Fig. S3. Cellular morphology of the WT, *bcr1/bcr1*, *cup9/cup9*, *nrg1/nrg1*, *czf1/czf1* and *rfg1/rfg1* mutants.

White and opaque cells from a representative colony of each mutant under pH 4.0 to 8.0 are shown. This Fig. corresponds to the colony morphology presented in **Fig. 6**.

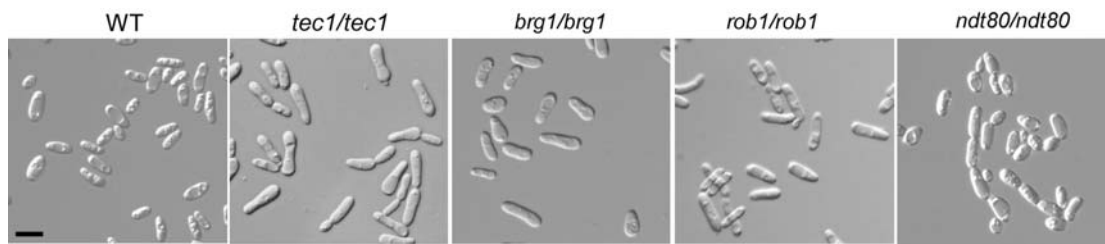

Fig. S4. Opaque cellular morphology of the *rob1/rob1* and *ndt80/ndt80* mutants.

WT, SN152a (*MTLa/a*), a derivative of SN152. The *tec1/tec1*, *brg1/brg1*, *rob1/rob1* and *ndt80/ndt80* mutants are homozygous at the *MTL* locus (Du et al., *Mol Biol Cell*, 2012).

**Table S1. White-to-opaque switching frequencies in the *bcr1/bcr1*, *cup9/cup9* and *czf1/czf1* mutants.**

| Strain           | White-to-opaque Swit. Freq.(%) |
|------------------|--------------------------------|
| WT               | <0.8                           |
| <i>bcr1/bcr1</i> | 1.9±0.5                        |
| <i>cup9/cup9</i> | 1.6±0.8                        |
| <i>czf1/czf1</i> | <0.7                           |

WT, JSM167, a derivative of SN250, *MTL $\alpha$ / $\alpha$* . White-opaque switching assay was performed at 25°C in air. The genotypes of the *bcr1/bcr1*, *cup9/cup9* and *czf1/czf1* mutants are listed in **Table S3**. Lee's medium (pH6.8) was used for cell growth.

**Table S2. Mating efficiency of the WT, *bcr1/bcr1*, *cup9/cup9* and *nrg1/nrg1* mutants.**

| Experimental strain | Mating efficiency of white cells | Mating efficiency of opaque cells |
|---------------------|----------------------------------|-----------------------------------|
| WT                  | $<1 \times 10^{-6}$              | $1.5 \times 10^{-3}$              |
| <i>bcr1/bcr1</i>    | $<1 \times 10^{-6}$              | $1.7 \times 10^{-2}$              |
| <i>cup9/cup9</i>    | $<1 \times 10^{-7}$              | $3.5 \times 10^{-2}$              |
| <i>nrg1/nrg1</i>    | $1.7 \times 10^{-5}$             | $1.9 \times 10^{-2}$              |

White and opaque cells of the experimental strains were crossed with opaque cells of a WT *MTL* opposite strain. *MTLa/a* and *MTL $\alpha$ / $\alpha$*  cells in white or opaque phase were mixed and cultured on Lee's glucose plates for 4 days at 25°C. About  $1 \times 10^6$  cells of each mating mixture were resuspended and plated onto selectable SCD plates. The mating efficiencies were calculated and shown. White and opaque cells of the WT (JSM167, *MTL $\alpha$ / $\alpha$* , *arg4*-), *bcr1/bcr1*(*MTL $\alpha$ / $\alpha$* , *arg4*-) and *cup9/cup9* (*MTL $\alpha$ / $\alpha$* , *arg4*-) mutants were crossed with the WT opaque tester (GH1012, *MTLa/a*, *ura3*-). White and opaque cells and white cells of the *nrg1/nrg1* mutant were crossed with the WT opaque test (WUM5A, *MTL $\alpha$ / $\alpha$* , *ura3*-). A representative selectable plate (depleted with uridine and L-arginine) of the WT and *bcr1/bcr1* mutant mating testing crosses was imaged and shown in **Fig. 4**.

**Table S3. Strains used in this study**

| Strain               | Parent strain | Genotype                                                                                                                                                          | Reference  |
|----------------------|---------------|-------------------------------------------------------------------------------------------------------------------------------------------------------------------|------------|
| GH1012               | CAI4          | <i>MTLa/a ura3::imm434/ura3::imm434</i>                                                                                                                           | [1]        |
| GH1013               | BWP17         | <i>MTLa/a ura3::imm434/ura3::imm434 his1::hisG/his1::hisG arg4::hisG/arg4::hisG</i>                                                                               | [1]        |
| GH1109               | GH1013        | <i>MTLa/a ura3::imm434/ura3::imm434 his1::hisG/his1::hisG arg4::hisG/arg4::hisG cyr1::ARG4/cyr1::HIS1</i>                                                         | [1]        |
| GH1296               | CCF3          | <i>MTLa/a ura3::imm434/ura3::imm434 flo8::hisG/flo8::hisG-URA3-hisG</i>                                                                                           | [2]        |
| MMY620               | CAI4          | <i>MTLa/mtla1::HisG mtlα2::HisG ura3::imm434/ura3::imm434 efg1::dpl200/efg1::URA3-dpl200</i>                                                                      | [3]        |
| SN250                | CAI4          | <i>MTLa/α ura3::imm434::URA3-IRO1/ura3::imm434 arg4::hisG/arg4::hisG his1::hisG/his1::hisG leu2::hisG::CdHIS1/leu2::hisG::CmLEU2</i>                              | [4]        |
| SN250 $\alpha\Delta$ | SN250         | <i>MTLa/ mtlα::FRT-SAT1-FRTura3::imm434::URA3-IRO1/ura3::imm434 arg4::hisG/arg4::hisG his1::hisG/his1::hisG leu2::hisG::CdHIS1/leu2::hisG::CmLEU2</i>             | This study |
| SN250 $\alpha$       | SN250         | <i>MTLα/α ura3::imm434::URA3-IRO1/ura3::imm434 arg4::hisG/arg4::hisG his1::hisG/his1::hisG leu2::hisG::CdHIS1/leu2::hisG::CmLEU2</i>                              | This study |
| TF137                | SN152         | <i>MTLa/α ura3::imm434::URA3-IRO1/ura3::imm434 arg4::hisG/arg4::hisG his1::hisG/his1::hisG leu2::hisG /leu2::hisG bcr1::CdHIS1/bcr1::CmLEU2</i>                   | [5]        |
| TF137 $\alpha$       | TF137         | <i>MTLα/α ura3::imm434::URA3-IRO1/ura3::imm434 arg4::hisG/arg4::hisG his1::hisG/his1::hisG leu2::hisG /leu2::hisG bcr1::CdHIS1/bcr1::CmLEU2</i>                   | This study |
| TF137 $\alpha\Delta$ | TF137         | <i>MTLa/ mtlα::FRT-SAT1-FRT ura3::imm434::URA3-IRO1/ura3::imm434 arg4::hisG/arg4::hisG his1::hisG/his1::hisG leu2::hisG /leu2::hisG bcr1::CdHIS1/bcr1::CmLEU2</i> | This study |
| CJN702               | BWP17         | <i>MTLa/α ura3::imm434arg4::hisGhis1::hisG::pHIS1bcr1::ARG4/ura3::imm434 arg4::hisG his1::hisG bcr1::URA3</i>                                                     | [6]        |
| CJN702a              | CJN702        | <i>MTLa/a ura3::imm434arg4::hisGhis1::hisG::pHIS1bcr1::ARG4/ura3::imm434 arg4::hisG his1::hisG bcr1::URA3</i>                                                     | This study |
| GH1501               | GH1109        | <i>MTLa/a ura3::imm434/ura3::imm434 his1::hisG/his1::hisG arg4::hisG/arg4::hisG cyr1::ARG4/cyr1::HIS1 bcr1::FRT /bcr1::URA3</i>                                   | This study |
| GH1502               | GH1296        | <i>MTLa/a ura3::imm434/ura3::imm434 flo8::hisG/flo8::hisG bcr1::FRT/bcr1::URA3</i>                                                                                | This study |

|                              |             |                                                                                                                                                                               |                                            |
|------------------------------|-------------|-------------------------------------------------------------------------------------------------------------------------------------------------------------------------------|--------------------------------------------|
| GH1503                       | MMY620      | <i>MTLa/mtla1::HisG mtlα2::HisG ura3::imm434/ura3::imm434 efg1::dpl200/efg1::dpl200 bcr1::FRT /bcr1::URA3</i>                                                                 | This study                                 |
| GH1281C                      | WYZ12       | <i>MTLα/α ura3:: imm434/ura3:: imm434 hgc1::AGR4/hgc1::HIS1</i>                                                                                                               | [2]                                        |
| <i>hgc1/hgc1 bcr1/bcr1</i>   | GH1281<br>α | <i>MTLα/α ura3:: imm434/ura3:: imm434 hgc1::AGR4/hgc1::HIS1 bcr1::FRT-SAT1-FRT/bcr1::URA3</i>                                                                                 | This study                                 |
| TF61                         | SN152       | <i>MTLa/α ura3::imm434::URA3-IRO1/ura3::imm434 arg4::hisG/arg4::hisG his1::hisG/his1::hisG leu2::hisG /leu2::hisG cup9::CdHIS1/cup9::CmLEU2</i>                               | [5]                                        |
| TF61C                        | TF61        | <i>MTLα/α ura3::imm434::URA3-IRO1/ura3::imm434 arg4::hisG/arg4::hisG his1::hisG/his1::hisG leu2::hisG /leu2::hisG cup9::CdHIS1/cup9::CmLEU2</i>                               | This study                                 |
| WCZF1M4B                     | WUM5A       | <i>MTLα/α czf1::FRT/czf1::FRT</i>                                                                                                                                             | [7]                                        |
| E5.3I-3                      |             | <i>MTLα/α, czf1::HisG/czf1::HisG-ura3-HisG</i>                                                                                                                                | Kumamoto<br>C.A., et al.,<br>(unpublished) |
| <i>nrg1/nrg1</i>             | GH1013      | <i>MTLa/a ura3::imm434/ura3::imm434 his1::hisG/his1::hisG arg4::hisG/arg4::hisG cyr1::ura3/nrg1::HIS1</i>                                                                     | This study                                 |
| <i>rfg1/rfg1</i>             | CaWY5       | <i>MTLα/α CaWY5 rfg1::HIS3 / rfg1::URA3</i>                                                                                                                                   | [2]                                        |
| SN152a                       | SN152       | <i>MTLa/a ura3::imm434::URA3-IRO1/ura3::imm434 arg4::hisG/arg4::hisG his1::hisG/his1::hisG leu2::hisG /leu2::hisG</i>                                                         | [2]                                        |
| CJN1787a                     | CJN1787     | As CJN1787, but <i>MTLa/α::SAT1</i>                                                                                                                                           | This study                                 |
| <i>tec1/tec1</i><br>(TF115α) |             | <i>MTLα/α ura3::imm434::URA3-IRO1/ura3::imm434 arg4::hisG/arg4::hisG his1::hisG/his1::hisG leu2::hisG /leu2::hisG tec1::CdHIS1/tec1::CmLEU2</i>                               | [2]                                        |
| <i>tec/tec1 bcr1/bcr1</i>    |             | <i>MTLα/α ura3::imm434::URA3-IRO1/ura3::imm434 arg4::hisG/arg4::hisG his1::hisG/his1::hisG leu2::hisG /leu2::hisG tec1::CdHIS1/tec1::CmLEU2 bcr1::FRT-SAT1-FRT/bcr1::ARG4</i> | This study                                 |
| TF22                         |             | <i>MTLa/α ura3::imm434::URA3-IRO1/ura3::imm434 arg4::hisG/arg4::hisG his1::hisG/his1::hisG leu2::hisG /leu2::hisG brg1::CdHIS1/brg1::CmLEU2</i>                               | [5]                                        |
| TF22α                        |             | <i>MTLa:: FRT-SAT1-FRT/α ura3::imm434::URA3-IRO1/ura3::imm434 arg4::hisG/arg4::hisG his1::hisG/his1::hisG leu2::hisG /leu2::hisG brg1::CdHIS1/brg1::CmLEU2</i>                | This study                                 |
| TF22α1                       |             | <i>MTLa:: FRT/α ura3::imm434::URA3-IRO1/ura3::imm434 arg4::hisG/arg4::hisG his1::hisG/his1::hisG leu2::hisG /leu2::hisG brg1::CdHIS1/brg1::CmLEU2</i>                         | This study                                 |
| <i>brg1/brg1 bcr1/bcr1</i>   |             | <i>MTLa:: FRT/α ura3::imm434::URA3-IRO1/ura3::imm434 arg4::hisG/arg4::hisG his1::hisG/his1::hisG leu2::hisG</i>                                                               | This study                                 |

|                                |        |                                                                                                                                                                           |            |
|--------------------------------|--------|---------------------------------------------------------------------------------------------------------------------------------------------------------------------------|------------|
|                                |        | <i>/leu2::hisG brg1::CdHIS1/brg1::CmLEU2<br/>bcr1::FRT-SAT1-FRT/bcr1::ARG4</i>                                                                                            |            |
| <i>brg1/brg1</i>               |        | <i>MTL<math>\alpha</math>/ura3::imm434::URA3-IRO1/ura3::imm434<br/>arg4::hisG/arg4::hisG his1::hisG/his1::hisG leu2::hisG<br/>/leu2::hisG brg1::CdHIS1/brg1::CmLEU2</i>   | [2]        |
| <i>rob1/rob1</i>               |        | <i>MTL<math>\alpha</math>/ura3::imm434::URA3-IRO1/ura3::imm434<br/>arg4::hisG/arg4::hisG his1::hisG/his1::hisG leu2::hisG<br/>/leu2::hisG rob1::CdHIS1/rob1::CmLEU2</i>   | [2]        |
| <i>ndt80/ndt80</i>             |        | <i>MTL<math>\alpha</math>/ura3::imm434::URA3-IRO1/ura3::imm434<br/>arg4::hisG/arg4::hisG his1::hisG/his1::hisG leu2::hisG<br/>/leu2::hisG ndt80::CdHIS1/ndt80::CmLEU2</i> | [2]        |
| <i>cph1/cph1</i>               | JKC18  | <i>MTL<math>\alpha</math>/ura3::imm434 /ura3::imm434 cph1::hisG/cph1::hisG</i>                                                                                            | [8]        |
| <i>cph1/cph1</i>               | JKC18a | <i>MTL<math>\alpha</math>/ura3::imm434/ura3::imm434 cph1::hisG/cph1::hisG</i>                                                                                             | This study |
| <i>cph1/cph1<br/>bcr1/bcr1</i> |        | <i>MTL<math>\alpha</math>/ura3::imm434 /ura3::imm434 cph1::hisG/cph1::hisG<br/>bcr1::URA3/bcr1::FRT-SAT1-FRT</i>                                                          | This study |

#### References:

1. Huang, G., Srikantha, T., Sahni, N., Yi, S., and Soll, D.R. (2009). CO(2) regulates white-to-opaque switching in *Candida albicans*. *Curr Biol* 19, 330-334.
2. Du, H., Guan, G., Xie, J., Cottier, F., Sun, Y., Jia, W., Muhlschlegel, F.A., and Huang, G. (2012). The transcription factor Flo8 mediates CO2 sensing in the human fungal pathogen *Candida albicans*. *Molecular biology of the cell* 23, 2692-2701.
3. Zordan, R.E., Miller, M.G., Galgoczy, D.J., Tuch, B.B., and Johnson, A.D. (2007). Interlocking transcriptional feedback loops control white-opaque switching in *Candida albicans*. *PLoS Biol* 5, e256.
4. Noble, S.M., French, S., Kohn, L.A., Chen, V., and Johnson, A.D. (2010). Systematic screens of a *Candida albicans* homozygous deletion library decouple morphogenetic switching and pathogenicity. *Nature genetics* 42, 590-598.
5. Homann, O.R., Dea, J., Noble, S.M., and Johnson, A.D. (2009). A phenotypic profile of the *Candida albicans* regulatory network. *PLoS Genet* 5, e1000783.
6. Nobile, C.J., Andes, D.R., Nett, J.E., Smith, F.J., Yue, F., Phan, Q.T., Edwards, J.E., Filler, S.G., and Mitchell, A.P. (2006). Critical role of Bcr1-dependent adhesins in *C. albicans* biofilm formation in vitro and in vivo. *PLoS Pathog* 2, e63.
7. Ramirez-Zavala, B., Reuss, O., Park, Y.N., Ohlsen, K., and Morschhauser, J. (2008). Environmental induction of white-opaque switching in *Candida albicans*. *PLoS Pathog* 4, e1000089.
8. Liu, H., J. Kohler & G. R. Fink, (1994) Suppression of hyphal formation in *Candida albicans* by mutation of a STE12 homolog. *Science* 266: 1723-1726.



**Table S4. Primers used in this study**

| Name             | Sequence (5' to 3')                        | Purpose                                              |                              |
|------------------|--------------------------------------------|------------------------------------------------------|------------------------------|
| probeECE1F       | CCATGCTCCAGAATTCAACA                       | Northern probes                                      |                              |
| probeECE1R       | TACTGAGCCGGCATCTCTTT                       |                                                      |                              |
| probeOP4F        | CTCGGTGGCAGCTCTAGTTC                       |                                                      |                              |
| probeOP4R        | CAGCTTGACCAGCAGCATT                        |                                                      |                              |
| probeWOR1F       | AGTGGTGGTAATGGCAATGG                       |                                                      |                              |
| probeWOR1R       | CGACCCAGAAGAATTTCCAA                       |                                                      |                              |
| probeHWP1F       | TCCAGAAGCTTCCATTCCAC                       |                                                      |                              |
| probeHWP1R       | GCAGCACCGAAAGTCAATCT                       |                                                      |                              |
| BCR1-fwd         | AATCTTGTGCGACAGAGAGCAGGGTCATACTTGA         | bcr1/bcr1+B<br>CR1p-BCR1<br>complement<br>ed plasmid |                              |
| BCR1-rev         | AATCTTAGATCTCACTGTCGTCACCCCAATACTGT        |                                                      |                              |
| BCR1-3'fwd       | AATCTTCTCGAG ACAGTATTGGGGTGACGACAGTG       |                                                      |                              |
| BCR1-3'rev       | AATCTTGTGCGAC CAACAATCTCCCTTCCCAAATAC      |                                                      |                              |
| BCR1-UP FWD      | TTATATGGGCCCAACCACAACAAATCAACCAACC         | pSFS2a-BC<br>R1KO                                    |                              |
| BCR1-UP REV      | AATCATCTCGAGGTTGTTGTAGTTGTTGTTTTTG         |                                                      |                              |
| BCR1-DOWN<br>FWD | TAATATCCGCGGACAGTATTGGGGTGACGACAGTG        |                                                      |                              |
| BCR1-DOWN<br>REV | ATATACGAGCTCCAACAATCTCCCTTCCCAAATAC        |                                                      |                              |
| BCR1-L FWD       | TCACAGCACGCATCTATGGC                       | Fusion PCR<br>for <i>BCR1</i> KO                     |                              |
| BCR1-L REV       | CACGGCGCGCCTAGCAGCGGAGATGAACTTGATGCCGACG   |                                                      |                              |
| BCR1-R FWD       | GTCAGCGGCCGCATCCCTGCCCTCATCCTAATTGGGGCTC   |                                                      |                              |
| BCR1-R REV       | TTGTTGTTGGTGTGAGTAGTGG                     |                                                      |                              |
| LT31             | CCGCTGCTAGGCGCGCCGTGGTTTTCCAGTCACGACGTT    |                                                      |                              |
| LT32             | GCAGGGATGCGGCCGCTGACTGTGGAATTGTGAGCGGATA   |                                                      |                              |
| NRG1-L FWD       | GCTTTCATCTTGTGTTGTAC                       |                                                      | Fusion PCR<br>for NRG1<br>KO |
| NRG1-L REV       | CACGGCGCGCCTAGCAGCGGTGAGATGAGAAACAGGATAACG |                                                      |                              |
| NRG1-R FWD       | GTCAGCGGCCGCATCCCTGCTGGTTACTGGTTCATGTATAGG |                                                      |                              |
| NRG1-R REV       | AGAGAAGATCTATGGCAATGC                      |                                                      |                              |

|               |                                                                                       |                                                                                        |
|---------------|---------------------------------------------------------------------------------------|----------------------------------------------------------------------------------------|
| NRG1-5DR      | CCCTGCTAGTTTCATTAAGAATCAAACAATCATTATGCTTTTATCAAC<br>AATCATATCCAATGTTTTCCCAGTCACGACGTT | Deletion of<br>the second<br>copy of<br><i>NRG1</i> gene                               |
| NRG1-3DR      | TTTGTTTTTCCCATTGGTATGAGTCTTGTAATGTTGATTACAATTAT<br>CTTGACGAGCAAAGTGGAATTGTGAGCGGATA   |                                                                                        |
| NRG1-CHKF     | ACACTACAACAACCTCAGCC                                                                  |                                                                                        |
| NRG1-CHKR     | ATGTCCTGAAGTAGTAAACG                                                                  |                                                                                        |
| CZF1-F        | ATTTGCGTTGTACTTCCCAG                                                                  | ChIP-PCRs                                                                              |
| CZF1-R        | CTGTGTATATGTCTTGGGTGAC                                                                |                                                                                        |
| CUP9-F        | AGATGAGATAGGTGTCATACAC                                                                |                                                                                        |
| CUP9-R        | TTAATCTTTGTGTCAGGCCATC                                                                |                                                                                        |
| NRG1-F        | TATACCTAGTAGCTGCATCC                                                                  |                                                                                        |
| NRG1-R        | TTCAACAATGGTGGAGAATG                                                                  |                                                                                        |
| EFG1-1BF      | AATCACTATTCTATCCCTTGC                                                                 |                                                                                        |
| EFG1-1BR      | TGTGTTTACGTGTCTCTGAC                                                                  |                                                                                        |
| EFG1-2BF      | ACTTGGTTCAAAGAAAGGAACG                                                                |                                                                                        |
| EFG1-2BR      | TTAGGTTGTAGTGAAAGCTTGC                                                                |                                                                                        |
| HGC1-NF       | TGTATGTGGATAGGGAAAAG                                                                  |                                                                                        |
| HGC1-NR       | ATTCTCTCTCTCTCTCGTTC                                                                  |                                                                                        |
| OP4(5') FWD:  | AACTGTGCCTGCACATAAAC                                                                  | For<br>construction<br>of Op4p<br>controlled<br><i>cartTA</i><br>expression<br>strains |
| OP4(5') REV:  | CTTTTATCTAATCTAGACATTATTTGTATGTGTGTAGGAG                                              |                                                                                        |
| CARTTA FWD:   | ATGTCTAGATTAGATAAAAG                                                                  |                                                                                        |
| CARTTA REV:   | CACGGCGCGCCTAGCAGCGGCTATTTACAATCAAAGGTGGTC                                            |                                                                                        |
| ARG4 FWD:     | CCGCTGCTAGGCGCGCCGTGGTTTTCCCAGTCACGACGTT                                              |                                                                                        |
| ARG4 REV:     | GCAGGGATGCGGCCGCTGACTGTGGAATTGTGAGCGGATA                                              |                                                                                        |
| OP4(3') FWD : | GTCAGCGGCCGCATCCCTGCCTCCAAGTGTGATACTTCTG                                              |                                                                                        |
| OP4(3') REV:  | GCAAAGCATAGAGTGATCTC                                                                  |                                                                                        |
